# Supplementary material for: Objective differential diagnosis of Noonan and Williams–Beuren syndromes in diverse populations using quantitative facial phenotyping
Source: PubMed Central journal article supplement (PMC8172204; doi:10.1002/mgg3.1636), 2021-03-27

## Supplementary material

In this document, we present the results obtained using our facial analysis technology to distinguish patients with Williams-Beuren syndrome from patients with Noonan syndrome based on their facial phenotype, both in the global population and in populations with African-descent, Asian, Caucasian and Latin American ancestry. The location of each of the 44 facial landmarks analyzed and the geometric metrics calculated from them are represented in Figure 1. Local binary patterns (LBP) were used to quantify the image appearance around each facial landmark, as represented in Figure 2. They were calculated by comparing the image patch around that landmark (in red in Figure 2) and a set of image patches in its neighborhood at different resolutions (in yellow, green and blue in Figure 2).

For each patient group, we present the following information:

- Population size and classification results, including the optimal number of features selected, and the variation of the sensitivity, specificity, accuracy and area under the receiver operator characteristic (ROC) curve with respect to the number of features.
- The list of discriminant geometric features selected, their distribution in the patients with Williams-Beuren and Noonan syndromes, and their individual and independent p-values estimated using a non-parametric Mann-Whitney test.
  - (H) next to a feature indicates that it is a horizontal distance normalized with respect to the ear-to-ear distance.
  - (V) next to a feature indicates that it is a vertical distance normalized with respect to the distance between the nose root and the mid-point between the oral commissures.
  - Angles are measured in degrees.
  - Asymmetry metrics are normalized to the average value of the left and right sides.
- The list of discriminant appearance features selected, their individual and independent p-values estimated using a non-parametric Mann-Whitney test, and the population-based computer-generated images illustrating their differences between patients with Williams-Beuren and Noonan syndromes. We present two types of appearance features:
  - Average texture: the appearance image is the average between the left and right sides of the face.
  - Asymmetry of texture: the appearance image is the absolute difference between the left and right side of the face, in which brighter shades of gray represent higher values.

On each appearance image, we represent: 1) the landmark location and the image patch around it in red; 2) the center of each neighbor patch in blue, with which the patch around the landmark location is compared to calculate the LBP; 3) and the image area involved in the calculation of the LBPs delimited with two green circles. Moreover, we included some markers in red in the form of arrows and lines to help identifying differences of appearance between patients with Noonan and Williams-Beuren syndromes.

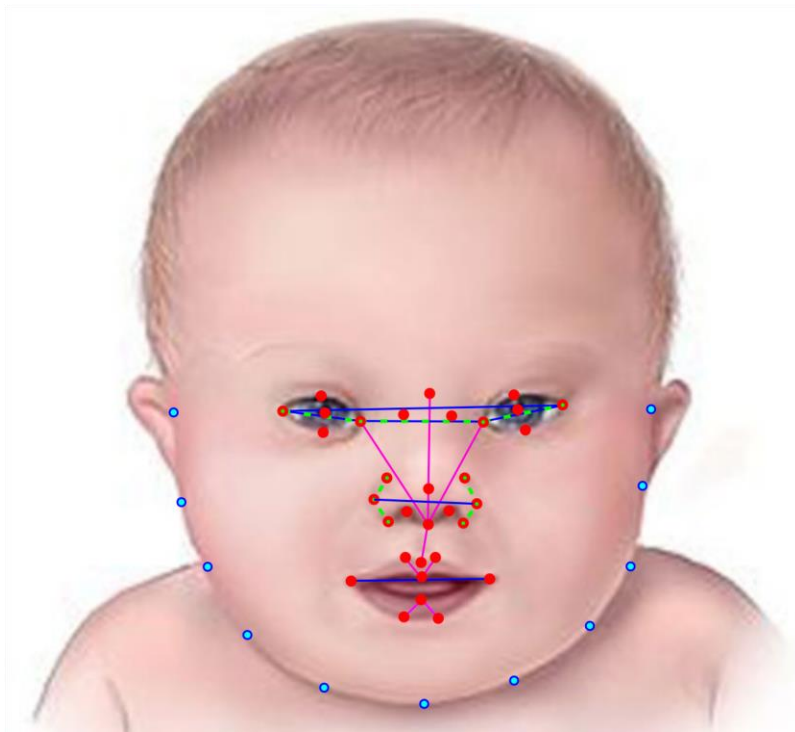

Figure 1. Representation of the facial landmarks and geometric metrics. Inner facial landmarks are represented as red circles. Horizontal distances between these landmarks are represented as blue lines. Vertical distances are represented as magenta lines. Angles are represented with green dashed lines, with the center of the angle represented as a green circle around the landmark, and the extremes represented with a green dot inside the landmark.

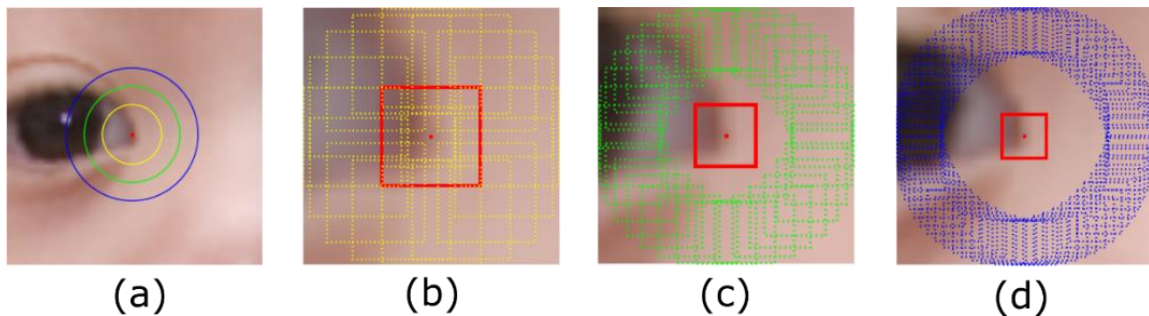

Figure 2. Representation of the image patches used to calculate the local binary patterns (LBP) around the medial canthi of the right eye. (a) shows the area around the landmark that is involved in the calculation of the LBPs at the three resolutions, in yellow for the highest resolution (R1), green for a medium resolution (R2), and blue for the lowest resolution (R3). (b), (c), and (d) illustrate the image patches involved in the calculation of the LBP at resolution levels R1, R2, and R3, respectively. At each level, the LBPs are calculated by comparing the image patch around the landmark (in red) with the patches in their neighborhood (in yellow for R1, green for R2, and blue for R3), as explained in [Cerroloza et al., "Identification of dysmorphic syndromes using landmark-specific local texture descriptors", IEEE International Symposium on Biomedical Imaging, pp.1080-1083, 2016 ].

### Global population

Area under ROC curve: 92.51%.

Optimal number of features: 14.

|                        | Patients | Accuracy (%) |
|------------------------|----------|--------------|
| <b>Noonan</b>          | 161      | 87.58        |
| <b>Williams-Beuren</b> | 286      | 84.62        |
| <b>Global</b>          | 447      | 85.68        |

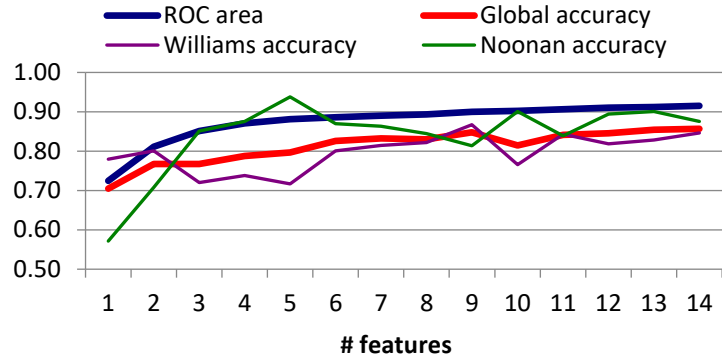

| Geometric features                             | Noonan  |       | Williams-Beuren |       | p-value  |
|------------------------------------------------|---------|-------|-----------------|-------|----------|
|                                                | Average | Std   | Average         | Std   |          |
| Distance between medial canthi (H)             | 0.294   | 0.027 | 0.275           | 0.023 | <0.001   |
| Lower lip thickness (V)                        | 0.173   | 0.024 | 0.192           | 0.027 | <0.001   |
| Distance between oral commissures (H)          | 0.364   | 0.060 | 0.413           | 0.071 | <0.001   |
| Distance between lateral canthi (H)            | 0.681   | 0.049 | 0.652           | 0.037 | <0.001   |
| Palpebral slanting angle                       | -2.299  | 2.312 | -3.227          | 2.751 | <0.001   |
| Nasal alas angle                               | 103.098 | 4.237 | 101.695         | 6.751 | <0.001   |
| Nose length (V)                                | 0.815   | 0.063 | 0.799           | 0.073 | 4.97E-02 |
| Distance between columella and cupid's bow (V) | 0.254   | 0.040 | 0.252           | 0.041 | 7.73E-01 |

| Appearance features                                                                                                        | Observations | p-value |
|----------------------------------------------------------------------------------------------------------------------------|--------------|---------|
| Average texture at lateral of lower lip vermillion (R2)                                                                    |              | <0.001  |
| <p>Interpretation: Patients with Williams-Beuren syndrome have a thicker lower lip than patients with Noonan syndrome.</p> |              |         |

|                                           |                                                                                                                                                                                                                                                                                                                                                                                                                                                                                                                                                                   |                         |         |                         |        |  |  |          |  |  |          |
|-------------------------------------------|-------------------------------------------------------------------------------------------------------------------------------------------------------------------------------------------------------------------------------------------------------------------------------------------------------------------------------------------------------------------------------------------------------------------------------------------------------------------------------------------------------------------------------------------------------------------|-------------------------|---------|-------------------------|--------|--|--|----------|--|--|----------|
| Average texture at top of nasal alas (R2) | <table border="0"> <tr> <td></td> <td data-bbox="690 212 769 233">Average</td> <td data-bbox="906 197 1036 233">Average texture pattern</td> </tr> <tr> <td data-bbox="609 296 630 365" style="writing-mode: vertical-rl; transform: rotate(180deg);">Noonan</td> <td data-bbox="639 243 842 449"></td> <td data-bbox="878 243 1081 449"></td> </tr> <tr> <td data-bbox="609 533 630 602" style="writing-mode: vertical-rl; transform: rotate(180deg);">Williams</td> <td data-bbox="639 474 842 680"></td> <td data-bbox="878 474 1081 680"></td> </tr> </table> |                         | Average | Average texture pattern | Noonan |  |  | Williams |  |  | 1.96E-02 |
|                                           | Average                                                                                                                                                                                                                                                                                                                                                                                                                                                                                                                                                           | Average texture pattern |         |                         |        |  |  |          |  |  |          |
| Noonan                                    |                                                                                                                                                                                                                                                                                                                                                                                                                                                                                                                                                                   |                         |         |                         |        |  |  |          |  |  |          |
| Williams                                  |                                                                                                                                                                                                                                                                                                                                                                                                                                                                                                                                                                   |                         |         |                         |        |  |  |          |  |  |          |

Interpretation: Patients with Williams-Beuren syndrome present longer nasal alas than patients with Noonan syndrome.

|                                        |                                                                                                                                                                                                                                                                                                                                                                                                                                                                                                                                                                           |                         |         |                         |        |  |  |          |  |  |          |
|----------------------------------------|---------------------------------------------------------------------------------------------------------------------------------------------------------------------------------------------------------------------------------------------------------------------------------------------------------------------------------------------------------------------------------------------------------------------------------------------------------------------------------------------------------------------------------------------------------------------------|-------------------------|---------|-------------------------|--------|--|--|----------|--|--|----------|
| Average texture at lateral canthi (R2) | <table border="0"> <tr> <td></td> <td data-bbox="690 772 769 793">Average</td> <td data-bbox="906 758 1036 793">Average texture pattern</td> </tr> <tr> <td data-bbox="609 856 630 926" style="writing-mode: vertical-rl; transform: rotate(180deg);">Noonan</td> <td data-bbox="639 804 842 1010"></td> <td data-bbox="878 804 1081 1010"></td> </tr> <tr> <td data-bbox="609 1094 630 1163" style="writing-mode: vertical-rl; transform: rotate(180deg);">Williams</td> <td data-bbox="639 1035 842 1241"></td> <td data-bbox="878 1035 1081 1241"></td> </tr> </table> |                         | Average | Average texture pattern | Noonan |  |  | Williams |  |  | 1.24E-01 |
|                                        | Average                                                                                                                                                                                                                                                                                                                                                                                                                                                                                                                                                                   | Average texture pattern |         |                         |        |  |  |          |  |  |          |
| Noonan                                 |                                                                                                                                                                                                                                                                                                                                                                                                                                                                                                                                                                           |                         |         |                         |        |  |  |          |  |  |          |
| Williams                               |                                                                                                                                                                                                                                                                                                                                                                                                                                                                                                                                                                           |                         |         |                         |        |  |  |          |  |  |          |

Interpretation: Patients with Noonan syndrome have more rounded palpebral fissures and patients with Williams-Beuren syndrome present smaller palpebral fissures.

|                            |                                                                                                                                                                                                                                                                                                                                                                                                                                                                                                                                                                                   |                         |         |                         |        |  |  |          |  |  |          |
|----------------------------|-----------------------------------------------------------------------------------------------------------------------------------------------------------------------------------------------------------------------------------------------------------------------------------------------------------------------------------------------------------------------------------------------------------------------------------------------------------------------------------------------------------------------------------------------------------------------------------|-------------------------|---------|-------------------------|--------|--|--|----------|--|--|----------|
| Texture at nasal root (R1) | <table border="0"> <tr> <td></td> <td data-bbox="690 1329 769 1350">Average</td> <td data-bbox="906 1314 1036 1350">Average texture pattern</td> </tr> <tr> <td data-bbox="609 1413 630 1482" style="writing-mode: vertical-rl; transform: rotate(180deg);">Noonan</td> <td data-bbox="639 1360 842 1566"></td> <td data-bbox="878 1360 1081 1566"></td> </tr> <tr> <td data-bbox="609 1650 630 1719" style="writing-mode: vertical-rl; transform: rotate(180deg);">Williams</td> <td data-bbox="639 1591 842 1797"></td> <td data-bbox="878 1591 1081 1797"></td> </tr> </table> |                         | Average | Average texture pattern | Noonan |  |  | Williams |  |  | 2.18E-01 |
|                            | Average                                                                                                                                                                                                                                                                                                                                                                                                                                                                                                                                                                           | Average texture pattern |         |                         |        |  |  |          |  |  |          |
| Noonan                     |                                                                                                                                                                                                                                                                                                                                                                                                                                                                                                                                                                                   |                         |         |                         |        |  |  |          |  |  |          |
| Williams                   |                                                                                                                                                                                                                                                                                                                                                                                                                                                                                                                                                                                   |                         |         |                         |        |  |  |          |  |  |          |

Interpretation: Patients with Noonan syndrome present higher orbital rims than patients with Williams-Beuren syndrome.

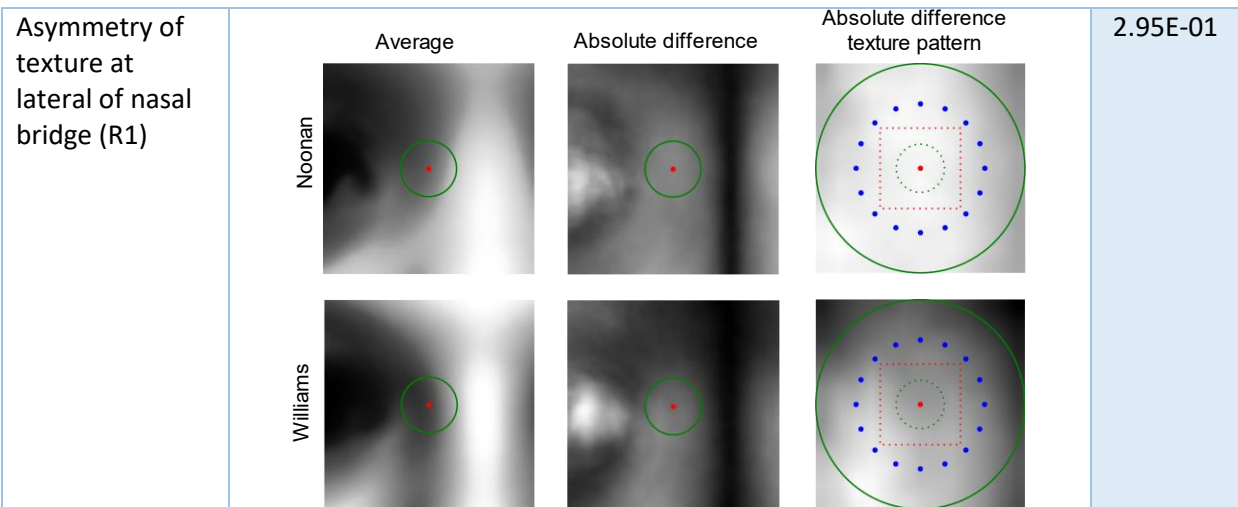

Interpretation: Patients with Noonan syndrome present a more asymmetric nasal bridge than patients with Williams-Beuren syndrome.

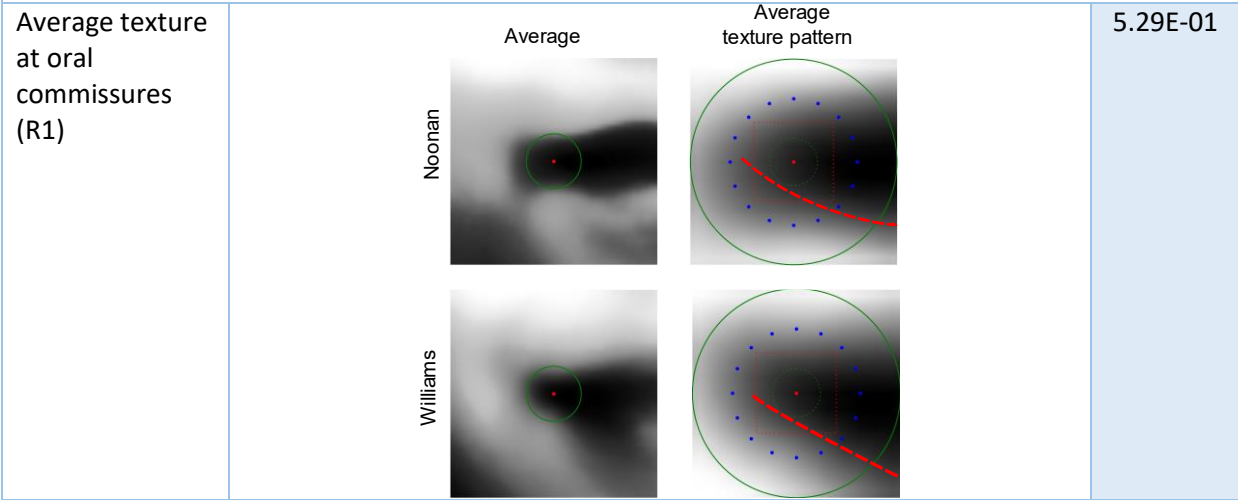

Interpretation: Patients with Williams-Beuren syndrome have thicker lower lips around the oral commissures than patients with Noonan syndrome.

### African descent population

Area under ROC curve: 96.12%.

Optimal number of features: 9.

|                 | Patients | Accuracy (%) |
|-----------------|----------|--------------|
| Noonan          | 35       | 88.57        |
| Williams-Beuren | 29       | 100.00       |
| Global          | 64       | 93.65        |

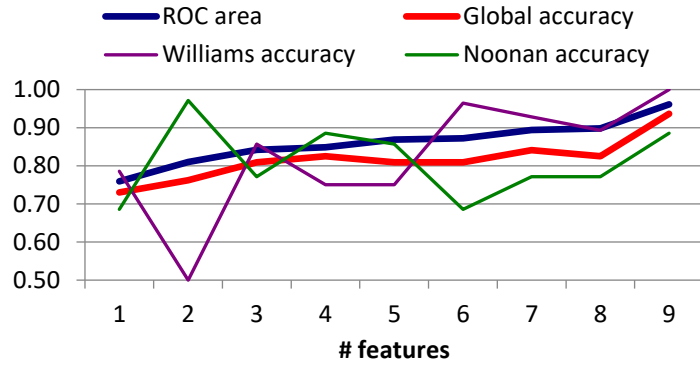

| Geometric features                    | Noonan  |       | Williams-Beuren |       | p-value  |
|---------------------------------------|---------|-------|-----------------|-------|----------|
|                                       | Average | Std   | Average         | Std   |          |
| Lower lip thickness (V)               | 0.175   | 0.019 | 0.203           | 0.031 | <0.001   |
| Distance between medial canthi (H)    | 0.307   | 0.029 | 0.289           | 0.024 | 8.76E-03 |
| Distance between oral commissures (H) | 0.357   | 0.055 | 0.400           | 0.089 | 6.28E-02 |

| Appearance features                                                                                                                                                                    | Observations | p-value  |
|----------------------------------------------------------------------------------------------------------------------------------------------------------------------------------------|--------------|----------|
| Average texture at lateral canthi (R2)                                                                                                                                                 |              | 1.07E-03 |
| <p>Interpretation: patients with Noonan syndrome have bigger and more rounded palpebral fissures than patients with Williams-Beuren syndrome, who present more significant ptosis.</p> |              |          |

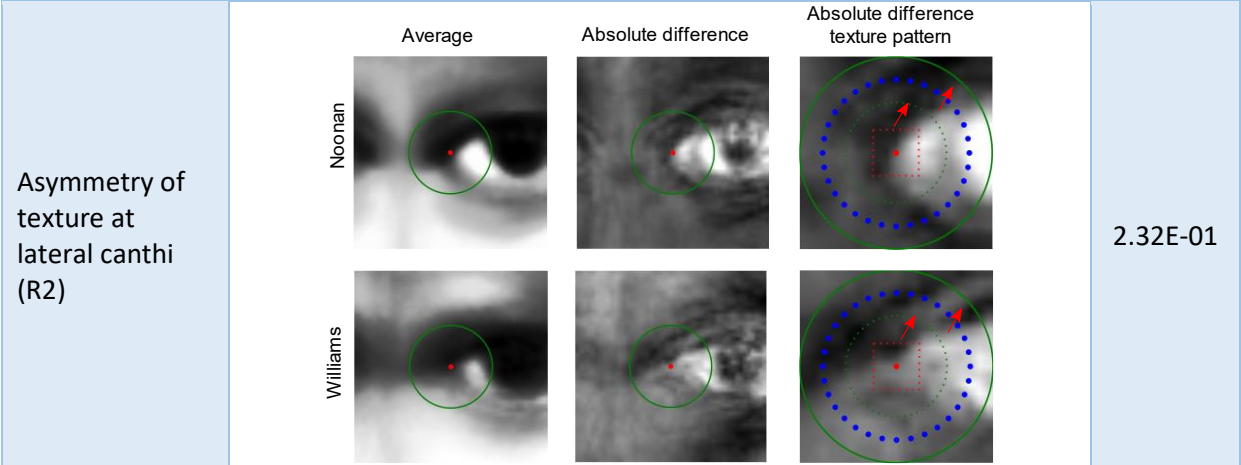

Interpretation: patients with Williams-Beuren syndrome present more asymmetric palpebral fissures than patients with Noonan syndrome.

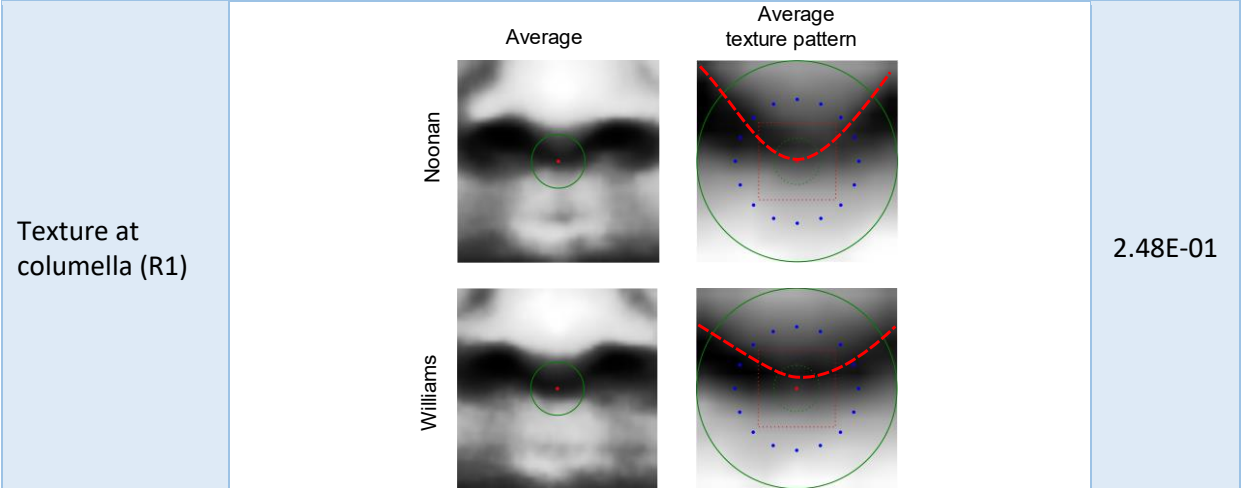

Interpretation: patients with Williams-Beuren syndrome present a more rounded nasal lobe than patients with Noonan syndrome.

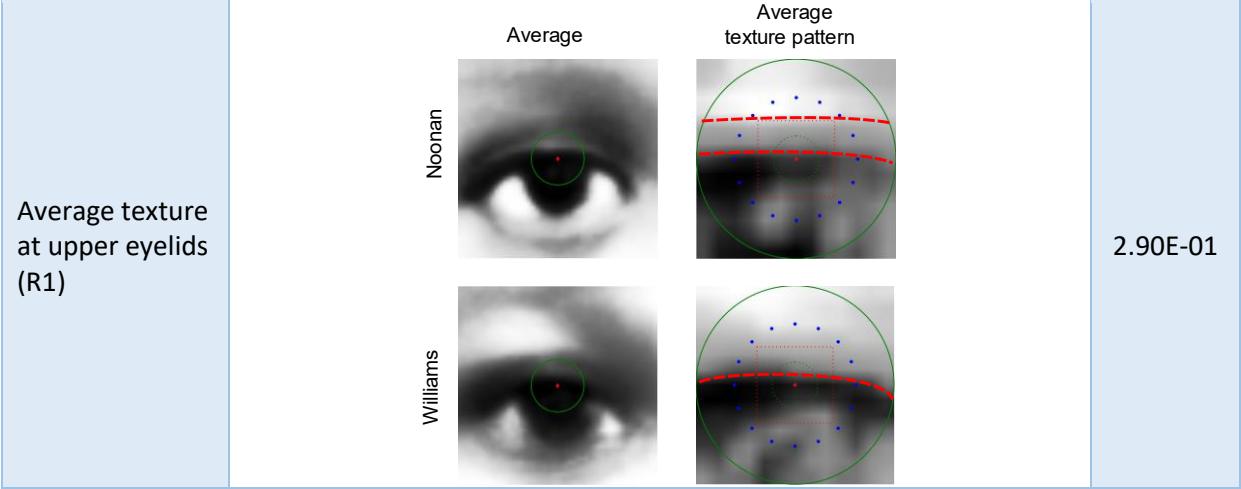

Interpretation: patients with Williams-Beuren syndrome present more pronounced ptosis than patients with Noonan syndrome.



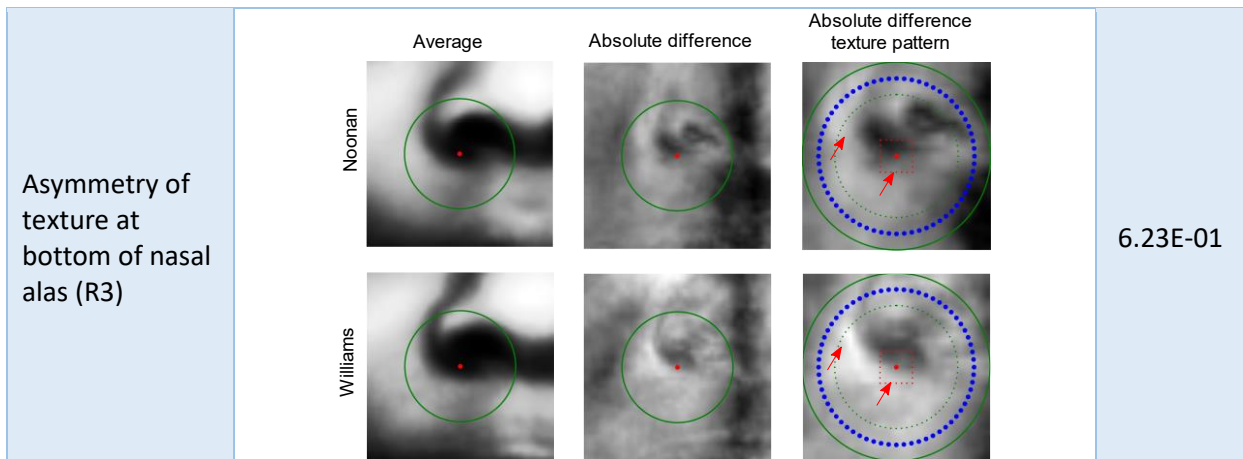

Interpretation: Patients with Williams-Beuren syndrome present more asymmetric nasal alas than patients with Noonan syndrome.

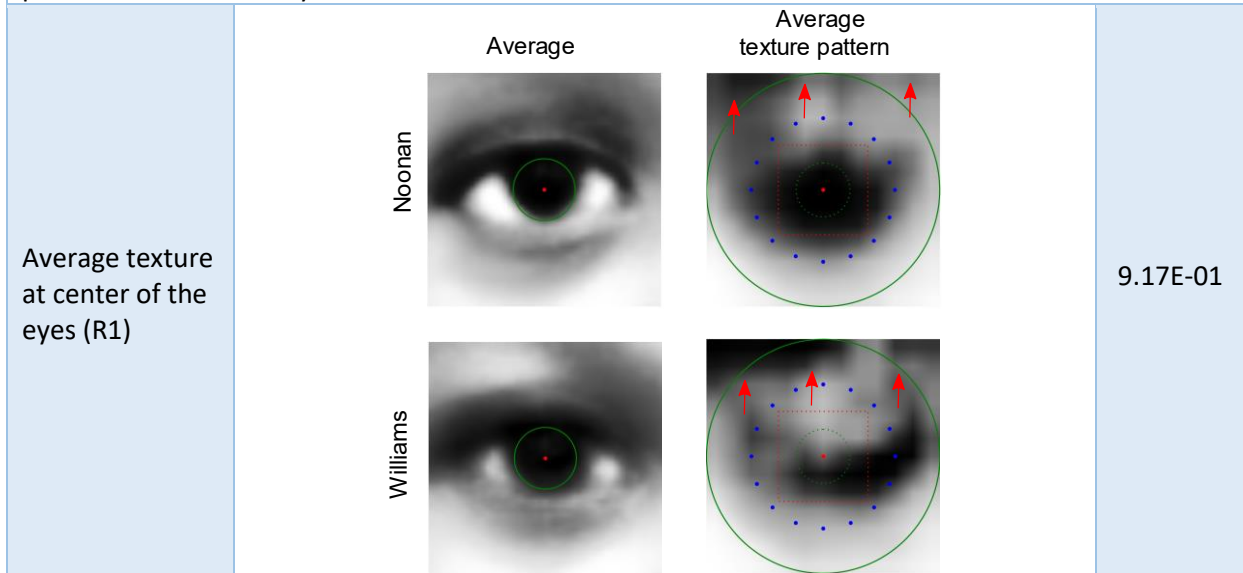

Interpretation: patients with Williams-Beuren syndrome have smaller palpebral fissures than patients with Noonan syndrome.



### Asian population

Area under ROC curve: 90.58%.

Optimal number of features: 10.

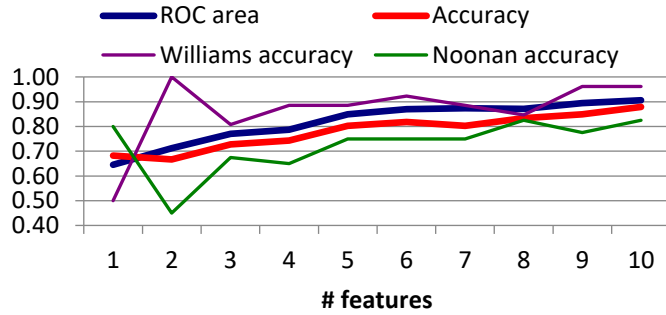

|                 | Patients | Accuracy (%) |
|-----------------|----------|--------------|
| Noonan          | 40       | 82.50        |
| Williams-Beuren | 26       | 96.15        |
| Global          | 66       | 87.88        |

| Geometric features                                          | Noonan  |       | Williams-Beuren |       | p-value  |
|-------------------------------------------------------------|---------|-------|-----------------|-------|----------|
|                                                             | Average | Std   | Average         | Std   |          |
| Lower lip thickness (V)                                     | 0.170   | 0.021 | 0.184           | 0.020 | 2.38E-03 |
| Distance between oral commissures (H)                       | 0.339   | 0.054 | 0.384           | 0.071 | 8.51E-03 |
| Palpebral slanting angle                                    | -2.485  | 2.224 | -3.774          | 1.972 | 2.53E-02 |
| Asymmetry in distance between medial and lateral canthi (H) | 0.007   | 0.006 | 0.011           | 0.009 | 1.11E-01 |

| Appearance features                                                                                                          | Observations                                                                                                                                                                                                                                                                                                                                                                                                                                                                                                                                                                                                                                                                                                                                                               | p-value  |
|------------------------------------------------------------------------------------------------------------------------------|----------------------------------------------------------------------------------------------------------------------------------------------------------------------------------------------------------------------------------------------------------------------------------------------------------------------------------------------------------------------------------------------------------------------------------------------------------------------------------------------------------------------------------------------------------------------------------------------------------------------------------------------------------------------------------------------------------------------------------------------------------------------------|----------|
| Average texture at center of the eyes (R2)                                                                                   | <div style="display: flex; justify-content: space-around;"> <div style="text-align: center;"> <p>Average</p> 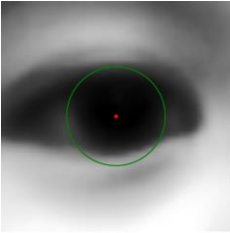 </div> <div style="text-align: center;"> <p>Average texture pattern</p>  </div> </div> <div style="display: flex; justify-content: space-around; margin-top: 10px;"> <div style="text-align: center;"> <p>Williams</p>  </div> <div style="text-align: center;"> <p>Average texture pattern</p>  </div> </div> | 1.17E-01 |
| <p>Interpretation: patients with Williams-Beuren syndrome smaller palpebral fissures than patients with Noonan syndrome.</p> |                                                                                                                                                                                                                                                                                                                                                                                                                                                                                                                                                                                                                                                                                                                                                                            |          |

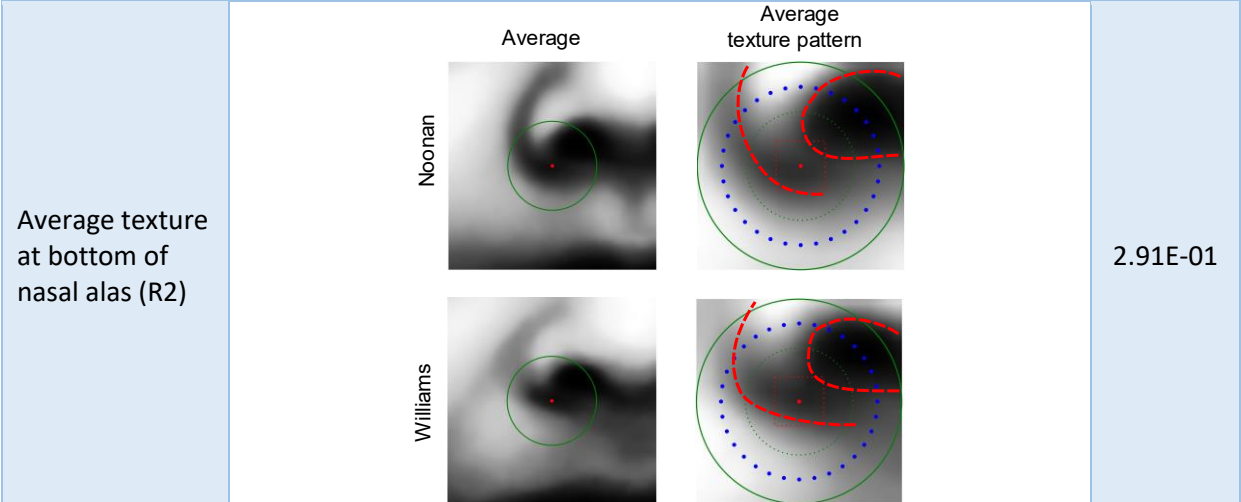

Interpretation: Patients with Williams-Beuren syndrome have longer nasal alas that patients with Noonan syndrome, who present more rounded alar rims.

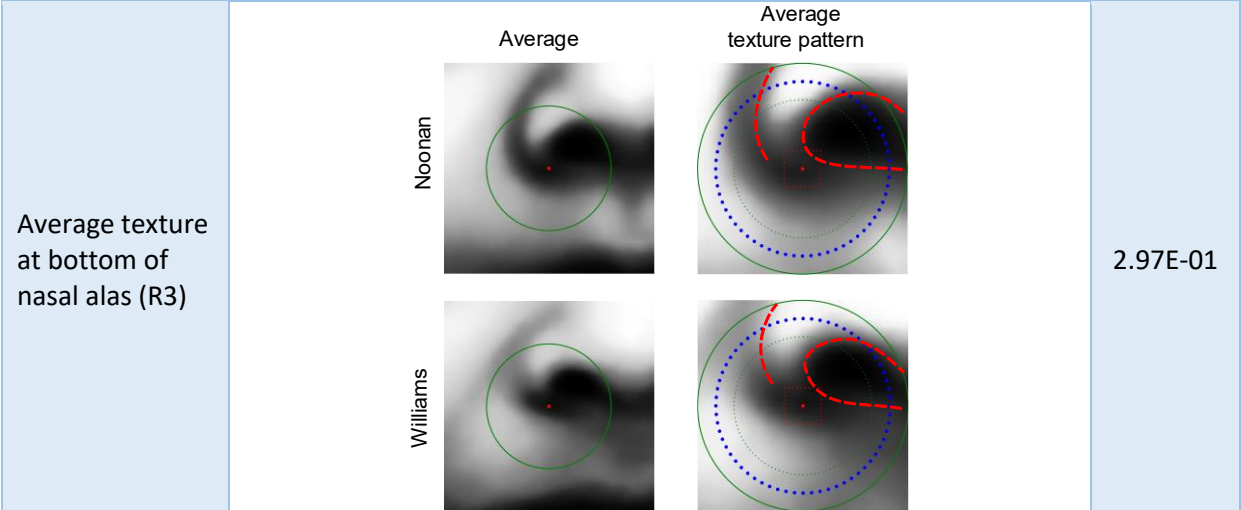

Interpretation: Patients with Williams-Beuren syndrome have longer nasal alas than patients with Noonan syndrome, who present more rounded alar rims.

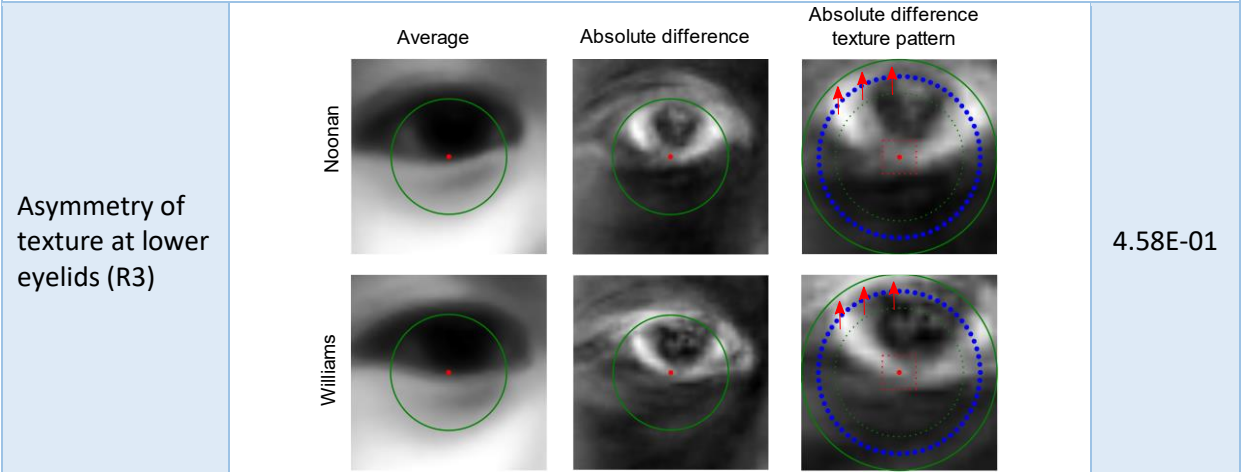

Interpretation: Patients with Williams-Beuren syndrome have more asymmetric palpebral fissures than patients with Noonan syndrome.

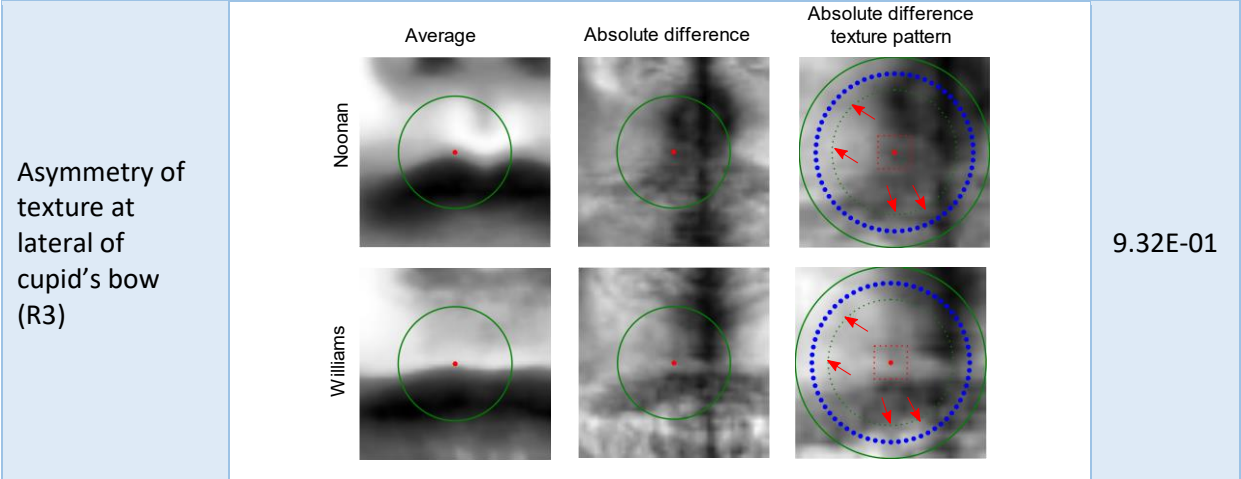

Interpretation: Patients with Williams-Beuren syndrome present more asymmetric upper lip than patients with Noonan syndrome.

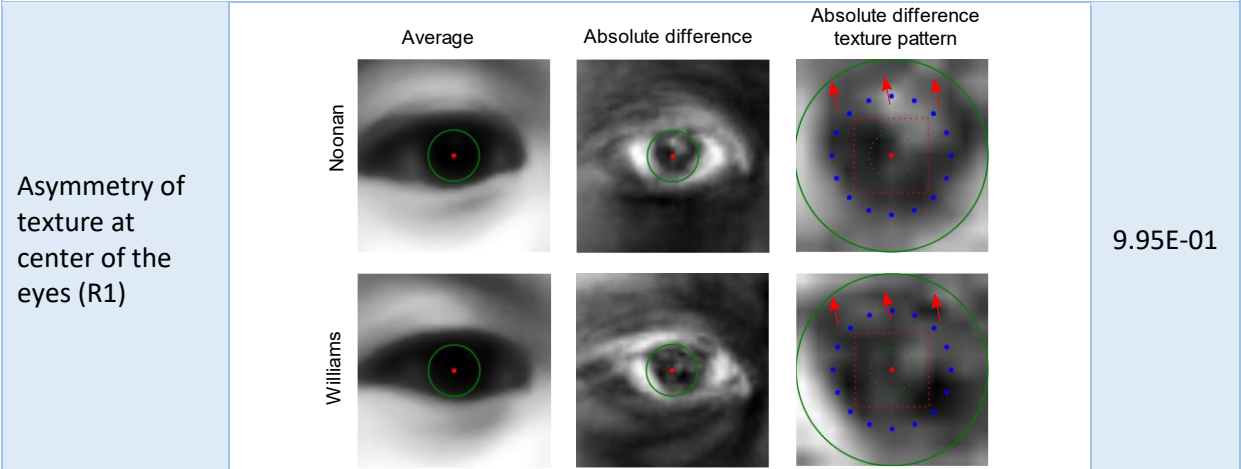

Interpretation: Patients with Williams-Beuren syndrome present more asymmetric palpebral fissures than patients with Noonan syndrome.

### Caucasian population

Area under ROC curve: 95.08%.

Optimal number of features: 10.

|                        | Patients | Accuracy (%) |
|------------------------|----------|--------------|
| <b>Noonan</b>          | 40       | 92.50        |
| <b>Williams-Beuren</b> | 121      | 90.91        |
| <b>Global</b>          | 161      | 91.30        |

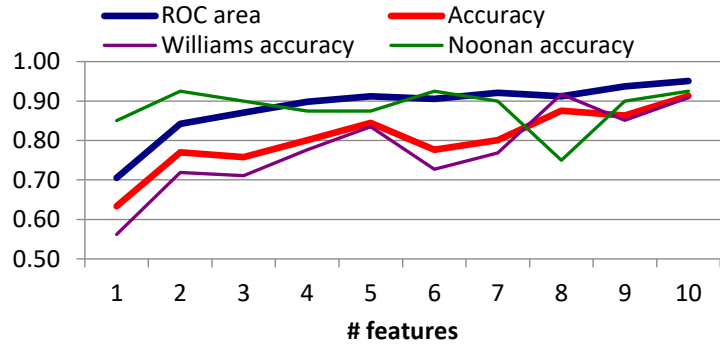

| Geometric features                    | Noonan  |       | Williams-Beuren |       | p-value  |
|---------------------------------------|---------|-------|-----------------|-------|----------|
|                                       | Average | Std   | Average         | Std   |          |
| Distance between medial canthi (H)    | 0.289   | 0.017 | 0.272           | 0.024 | <0.001   |
| Lower lip thickness (V)               | 0.172   | 0.030 | 0.188           | 0.024 | <0.001   |
| Asymmetry in upper lip thickness (V)  | 0.008   | 0.006 | 0.015           | 0.011 | <0.001   |
| Distance between oral commissures (H) | 0.373   | 0.054 | 0.421           | 0.067 | <0.001   |
| Distance between lateral canthi (H)   | 0.668   | 0.029 | 0.648           | 0.033 | 1.11E-03 |
| Palpebral slanting angle              | -1.202  | 2.380 | -2.547          | 2.721 | 5.12E-03 |
| Nose length (V)                       | 0.817   | 0.057 | 0.798           | 0.081 | 1.65E-01 |

| Appearance features                   | Observations |                     |                                     | p-value  |
|---------------------------------------|--------------|---------------------|-------------------------------------|----------|
| Asymmetry of texture at nostrils (R1) | Average      | Absolute difference | Absolute difference texture pattern | 2.98E-02 |
|                                       | Noonan       |                     |                                     |          |
| Williams                              |              |                     |                                     |          |

Interpretation: Patients with Williams-Beuren syndrome present more asymmetric nasal alar and lobe than patients with Noonan syndrome.

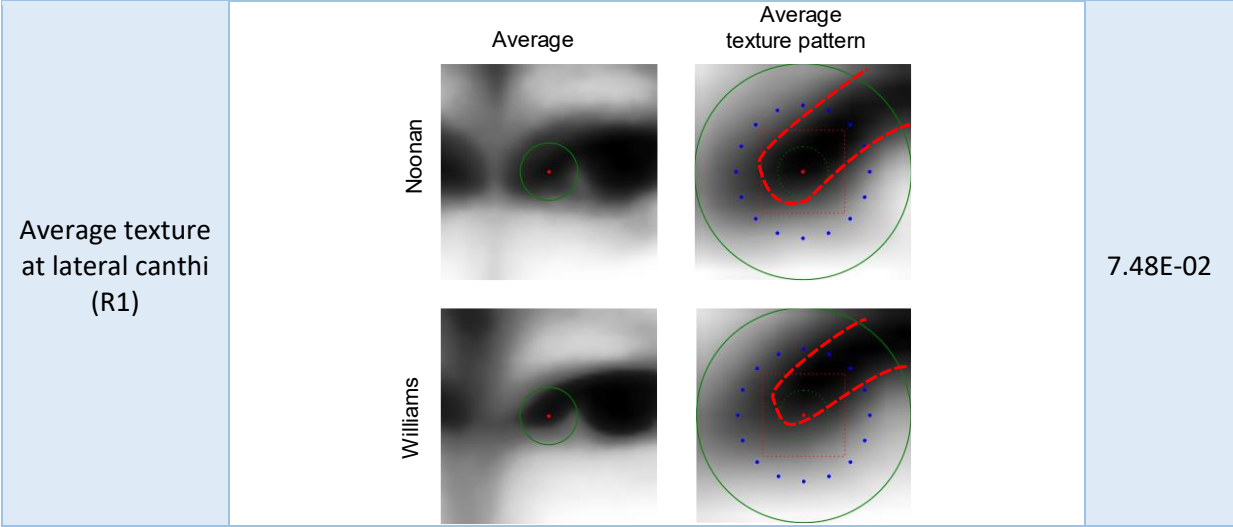

Interpretation: Patients with Williams-Beuren syndrome present more pronounced ptosis than patients with Noonan syndrome.

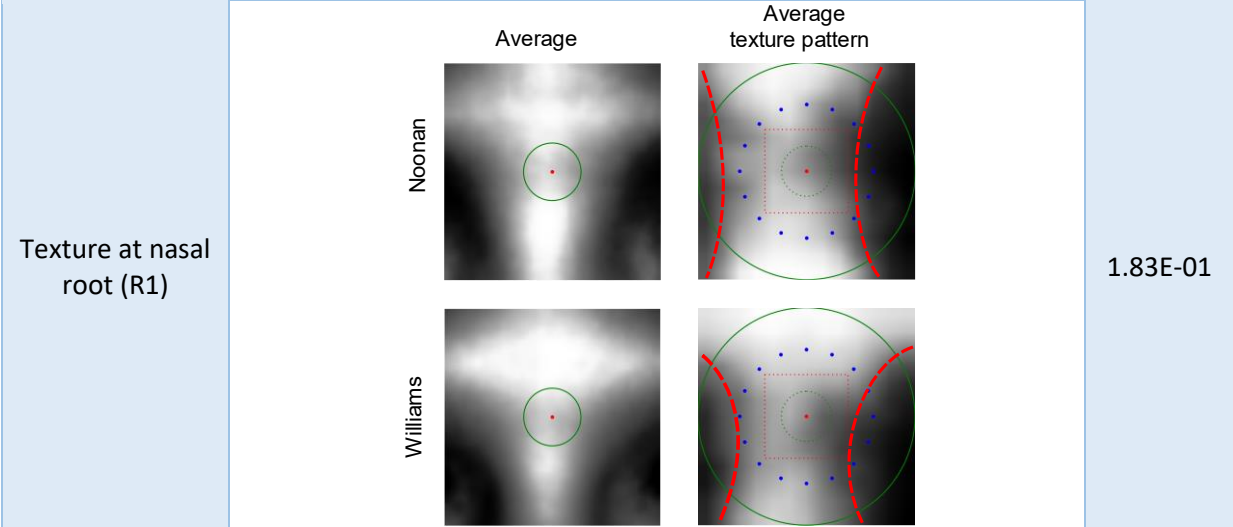

Interpretation: Patients with Noonan syndrome present higher orbital rims than patients with Williams-Beuren syndrome.

### Latin American population

Area under ROC curve: 93.75%.

Optima number of features: 13.

|                 | Patients | Accuracy (%) |
|-----------------|----------|--------------|
| Noonan          | 46       | 91.30        |
| Williams-Beuren | 111      | 88.28        |
| Global          | 157      | 89.17        |

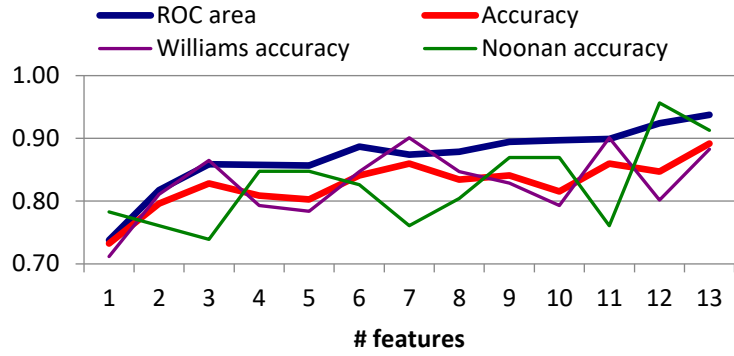

| Geometric features                    | Noonan  |       | Williams-Beuren |       | p-value  |
|---------------------------------------|---------|-------|-----------------|-------|----------|
|                                       | Average | Std   | Average         | Std   |          |
| Lower lip thickness (V)               | 0.174   | 0.019 | 0.196           | 0.027 | <0.001   |
| Distance between medial canthi (H)    | 0.291   | 0.024 | 0.274           | 0.019 | <0.001   |
| Distance between oral commissures (H) | 0.382   | 0.064 | 0.413           | 0.068 | 7.23E-03 |
| Nose length (V)                       | 0.836   | 0.068 | 0.805           | 0.065 | 1.52E-02 |
| Asymmetry in lower lip thickness (V)  | 0.013   | 0.017 | 0.013           | 0.011 | 2.85E-01 |

| Appearance features        | Observations                                                                                                                                                                                                                     | p-value  |
|----------------------------|----------------------------------------------------------------------------------------------------------------------------------------------------------------------------------------------------------------------------------|----------|
| Texture at nasal root (R3) | <div style="display: flex; justify-content: space-around;"> <div style="text-align: center;"> <p>Average</p> <p>Noonan</p> </div> <div style="text-align: center;"> <p>Average texture pattern</p> <p>Williams</p> </div> </div> | 7.53E-05 |

Interpretation: Patients with Noonan syndrome present higher orbital rims than patients with Williams-Beuren syndrome.

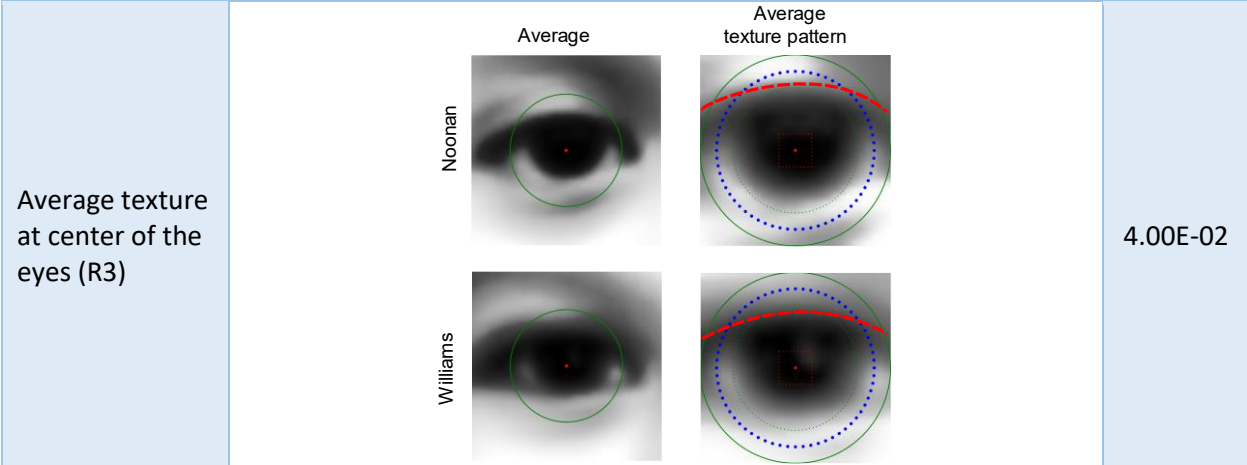

Interpretation: Patients with Williams-Beuren syndrome present smaller palpebral fissures than patients with Noonan syndrome.

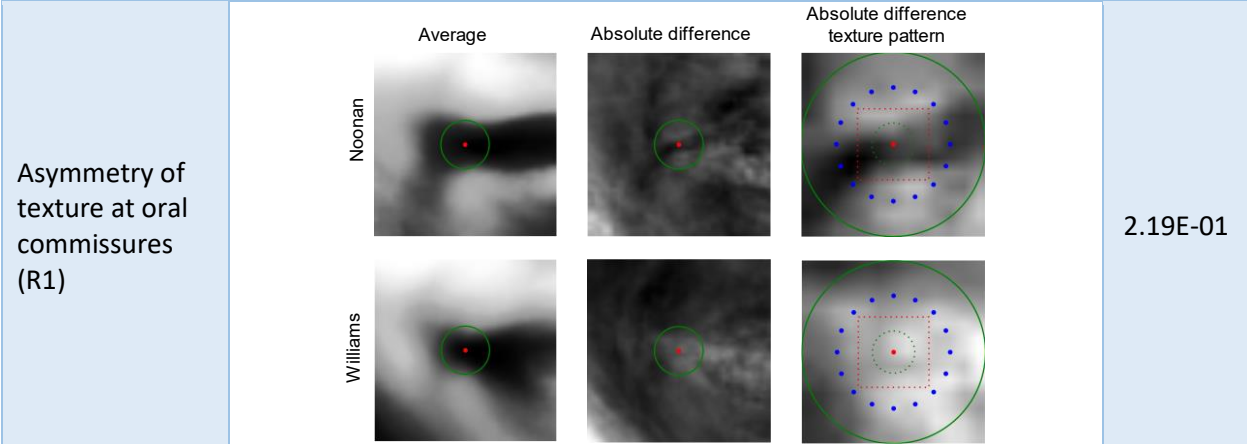

Interpretation: Patients with Williams-Beuren syndrome present more asymmetric oral commissures than patients with Noonan syndrome.

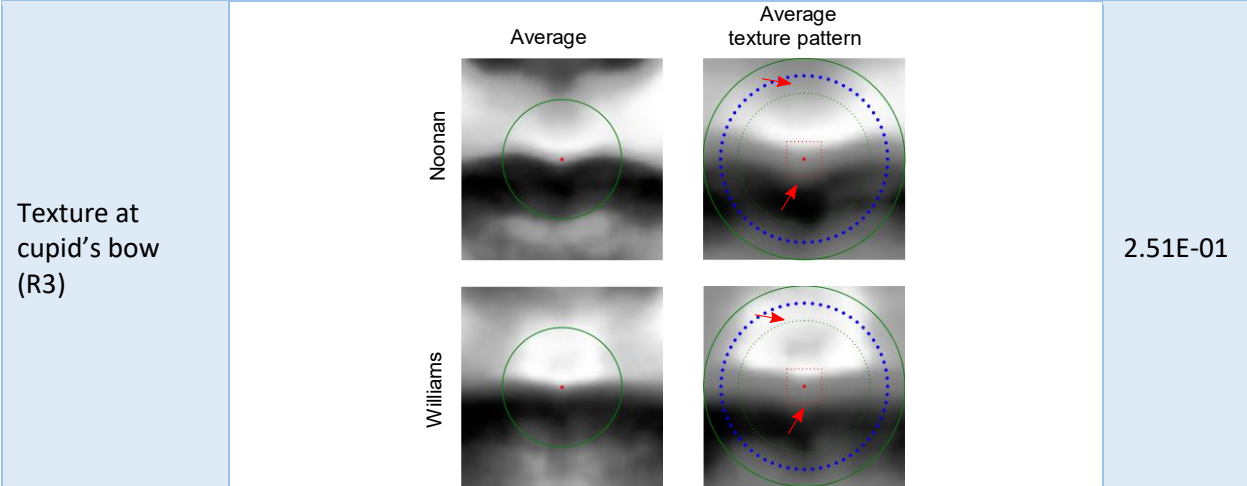

Interpretation: Patients with Williams-Beuren syndrome present flatter cupid's bow and philtrum than patients with Noonan syndrome.



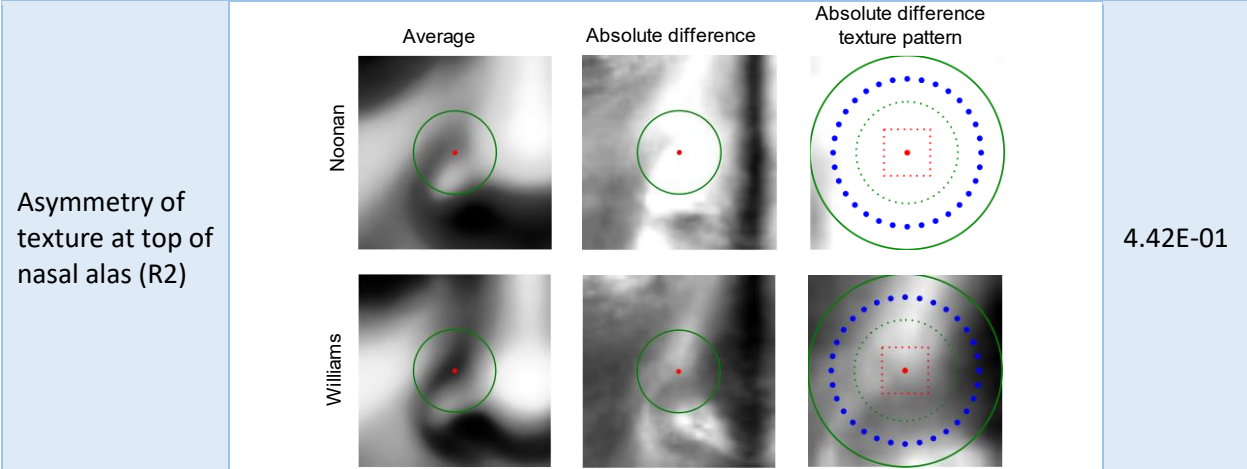

Interpretation: Patients with Noonan syndrome present more asymmetric nasal alae than patients with Williams-Beuren syndrome.

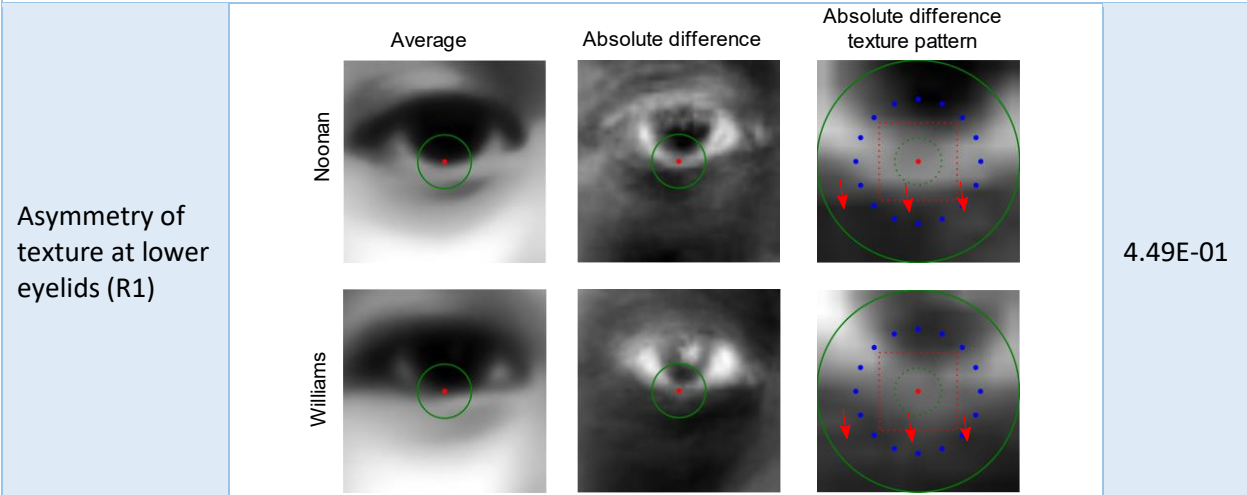

Interpretation: Patients with Williams-Beuren syndrome have more asymmetric palpebral fissures than patients with Noonan syndrome.

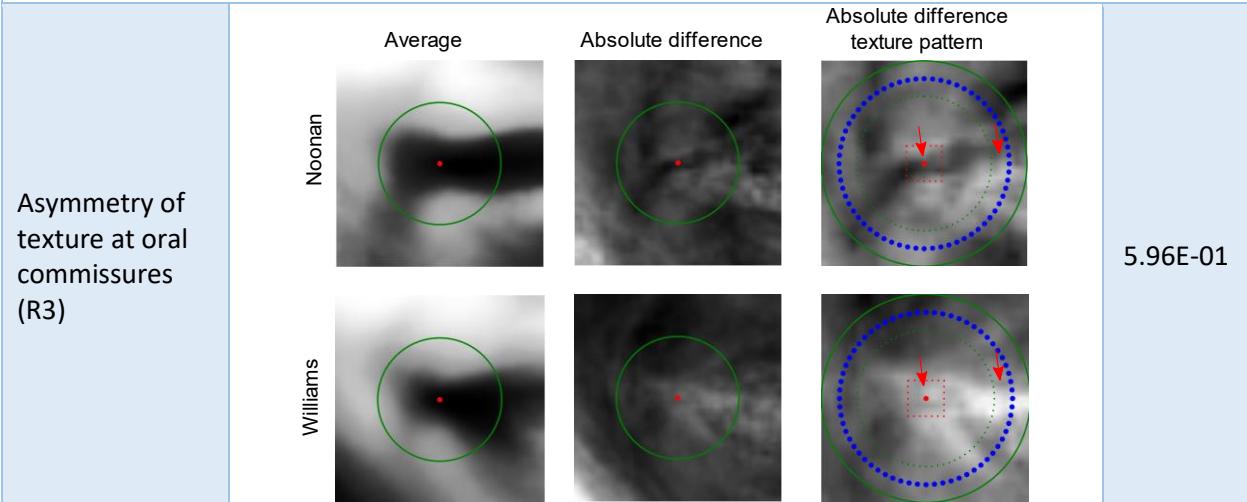

Interpretation: Patients with Williams-Beuren syndrome present a more asymmetric mouth than patients with Noonan syndrome.

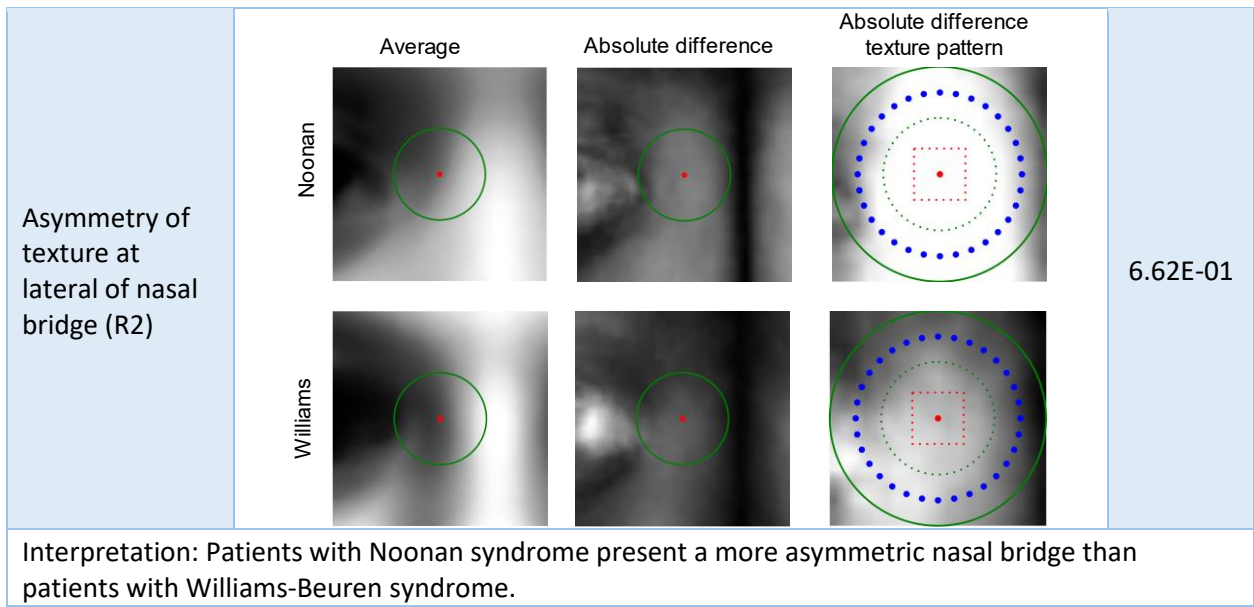

Supplement: MGG3-9-e1636-s001.pdf [file MGG3-9-e1636-s001.pdf]
